# Supplementary material
Source: publisher site journal article supplement (https://www.dovepress.com/get_supplementary_file.php?f=379264.docx)
Supplement: Supplementary file 1 [file get_supplementary_file.php]

1A

**1B**

**1C**

**Supplementary** **Figure 1.** Mutations of ribosomal proteins L3, L4 and L22 in S. xylosus and R-tylosin S. xylosus. Sequencing and blast were used to explore the mutations of ribosomal proteins L3, L4 and L22 in S. xylosus and R-tylosin S. xylosus. (A) Amino acid sequence comparison of ribosomal protein L3 in S. xylosus and R-tylosin S. xylosus. (B) Amino acid sequence comparison of ribosomal protein L4 in S. xylosu sand R-tylosin S. xylosus. (C) Amino acid sequence comparison of ribosomal protein L22 in S. xylosus and R-tylosin S. xylosus.

**2A**

**2B**

**2C**

**Supplementary** **Figure 2.** Comparison of sequencing results of mutant fragments in *S. xylosus* and Tylosin-resistant *S. xylosus.* (A) Comparison of sequencing results of mutant ribosomal protein L3 fragment. (B) Comparison of sequencing results of mutant ribosomal protein L4 fragment. (C) Comparison of sequencing results of mutant ribosomal protein L22 fragment.

**
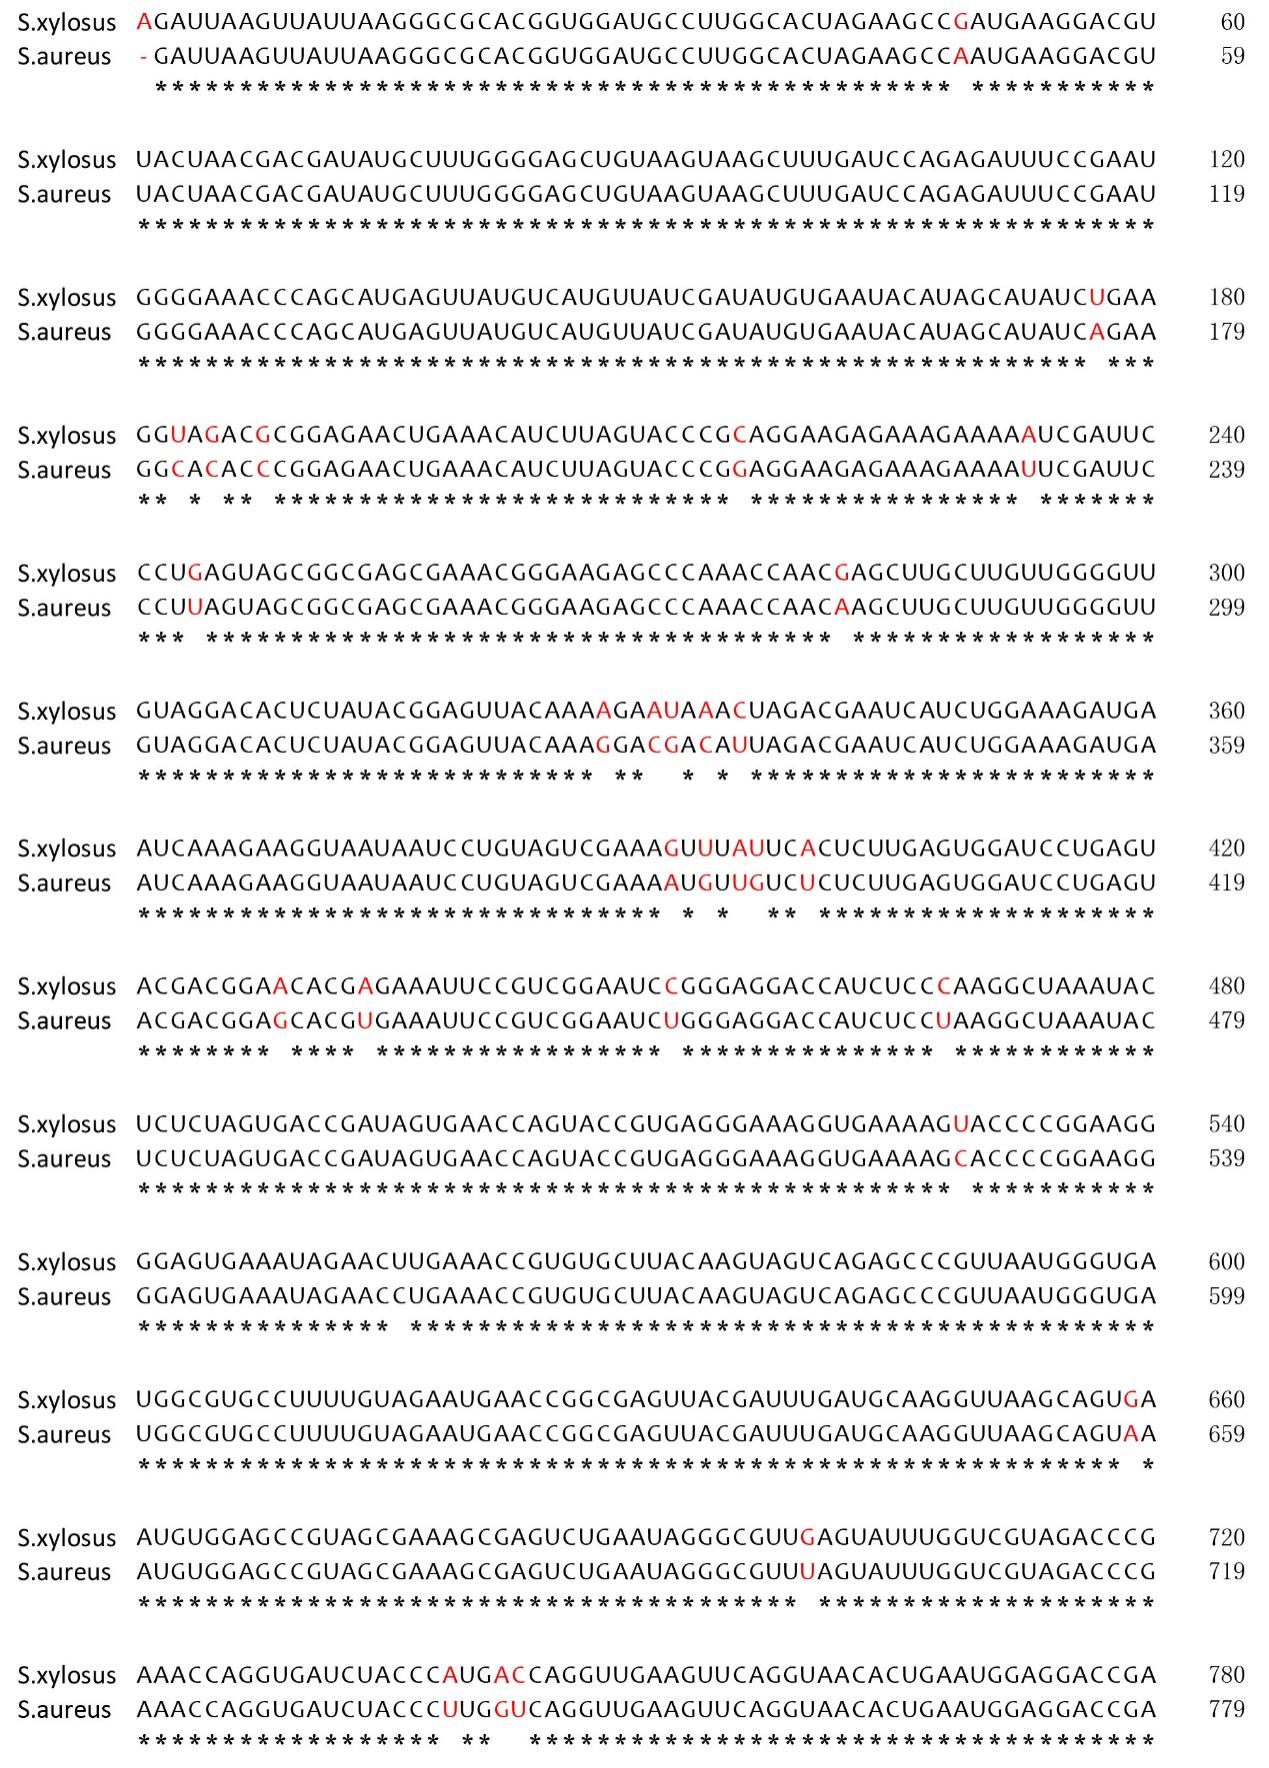
**

**
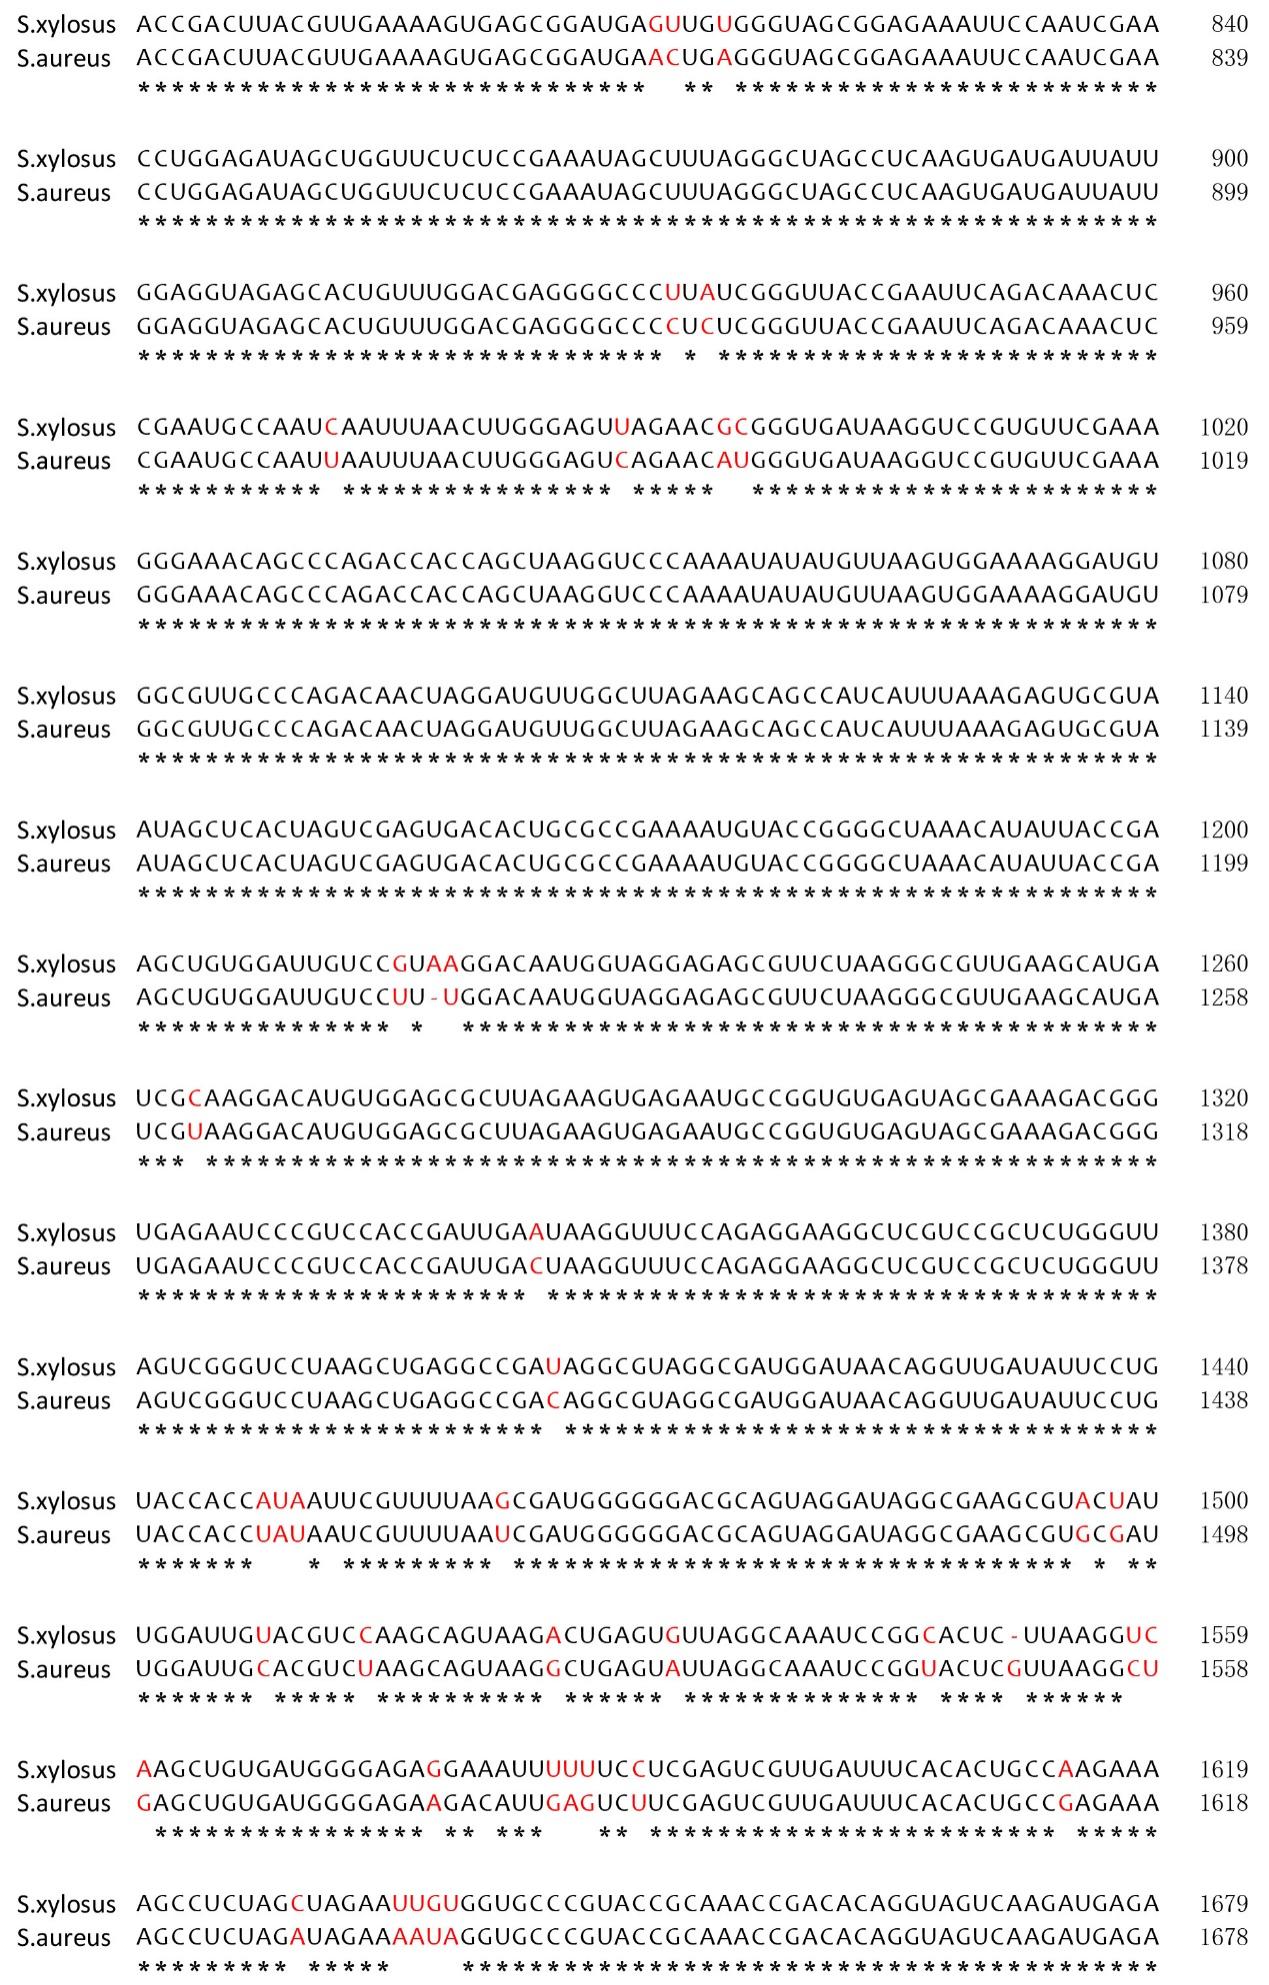
**

**Supplementary** **Figure 3.** Continue

**
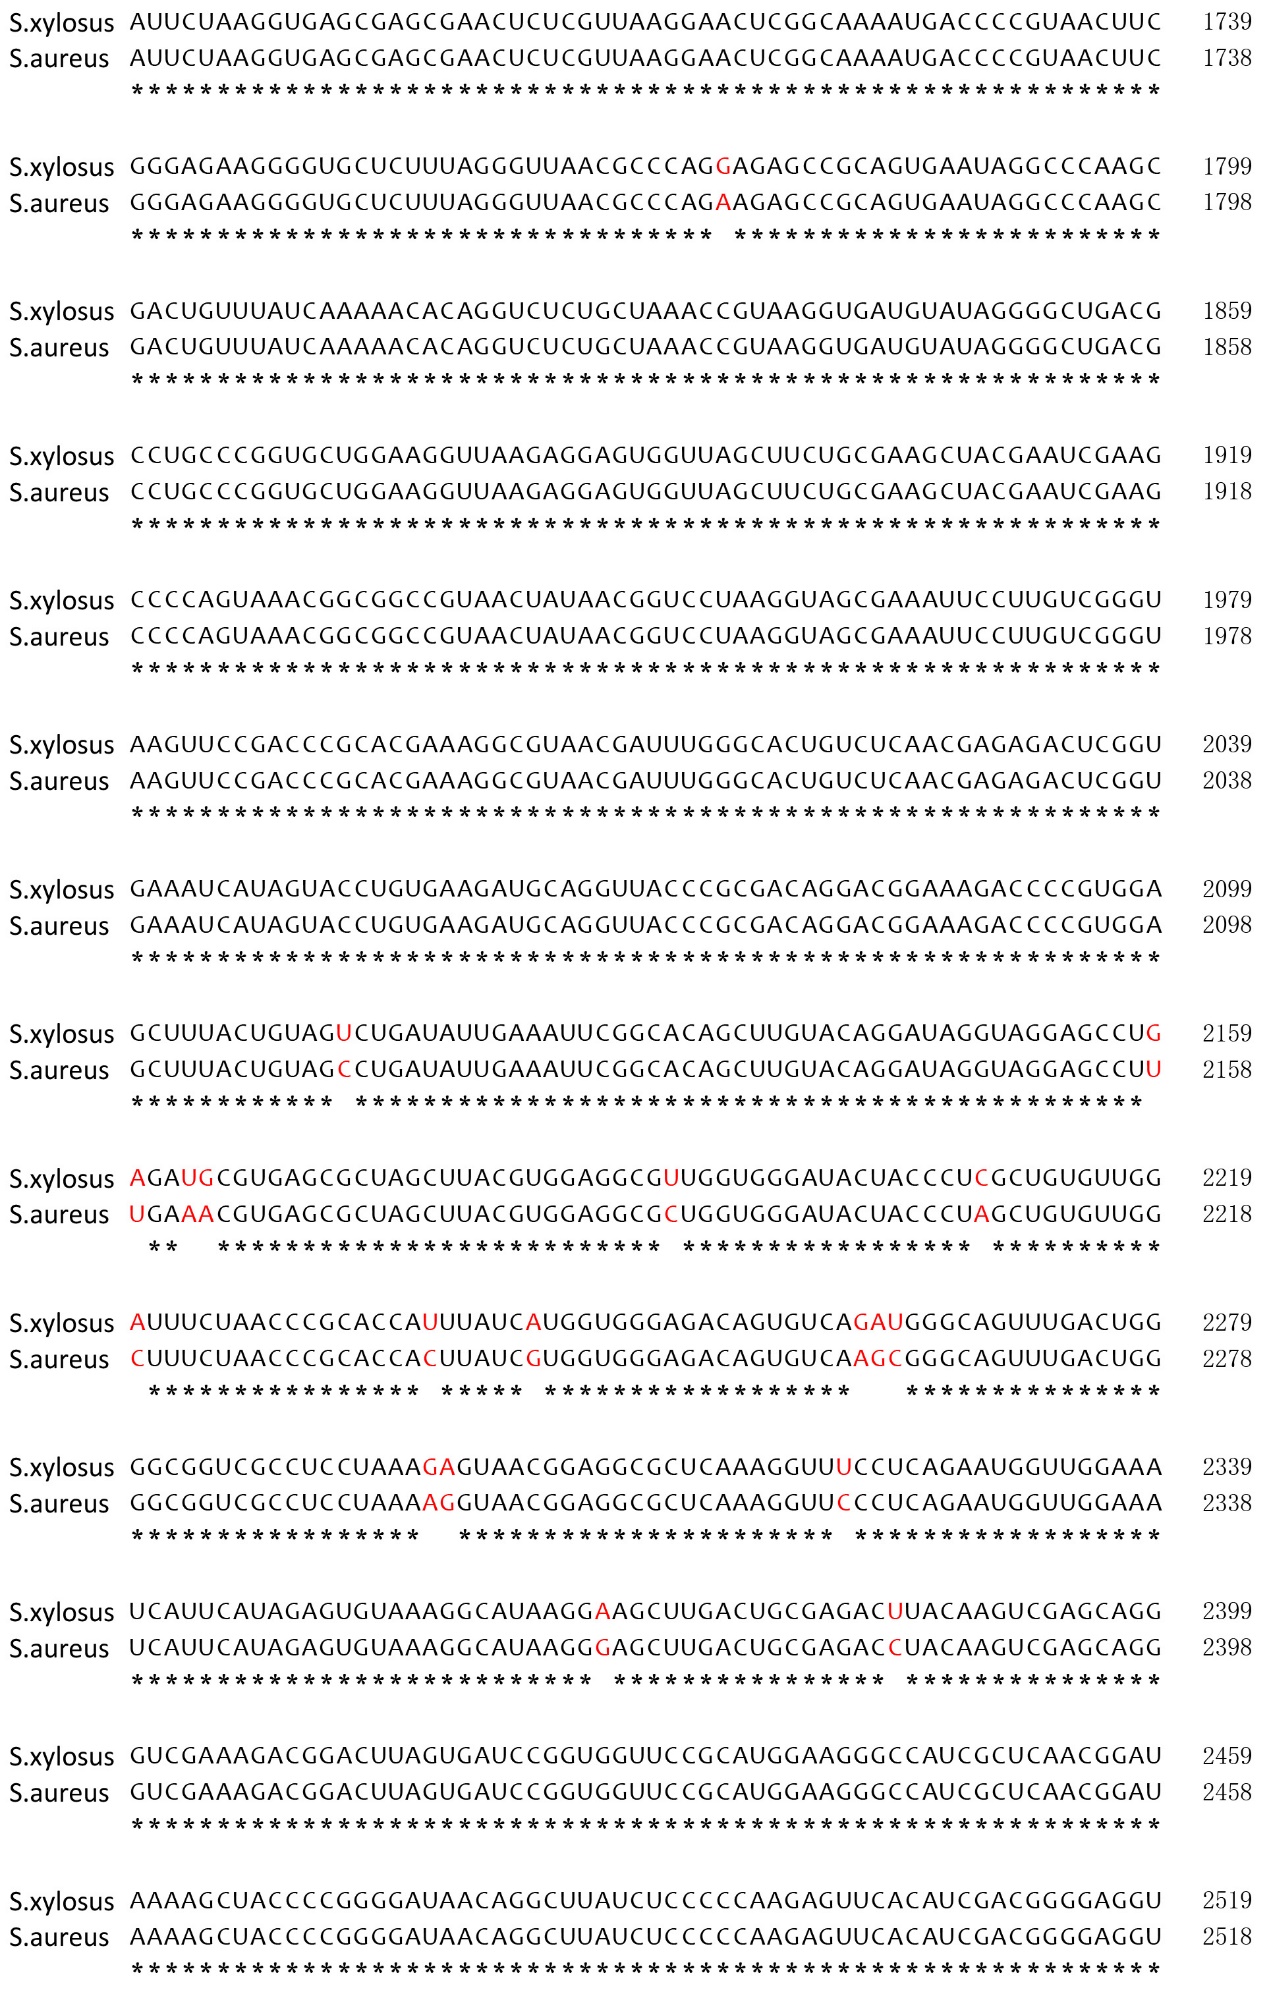
**

**Supplementary** **Figure 3.** Continue

**
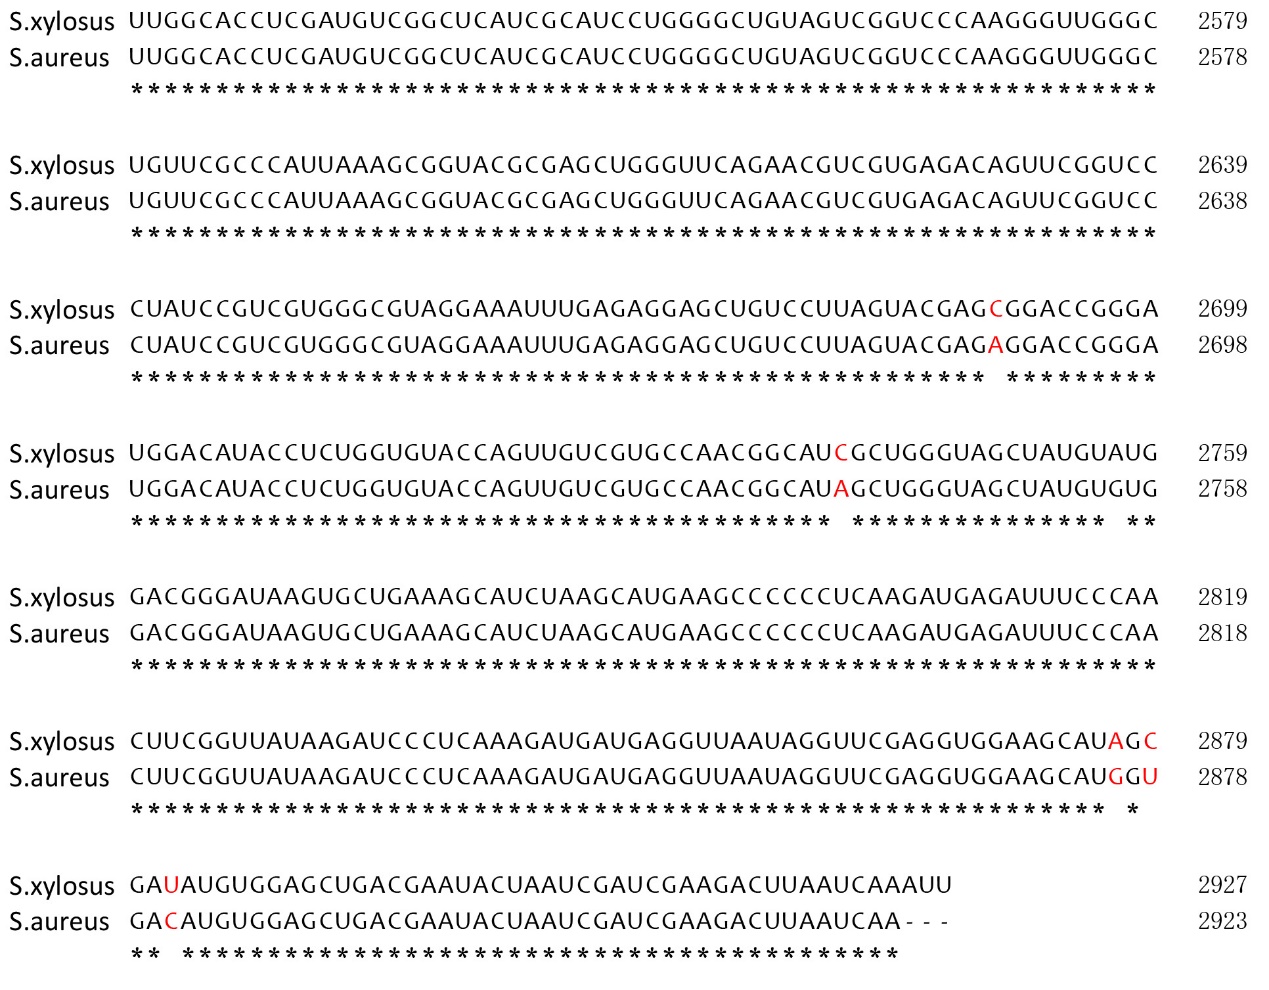
**

**Supplementary** **Figure 3.** The sequence alignment of 23S rRNA between *S. xylosus* and *S. aureus*. The different bases were shown in red.

**
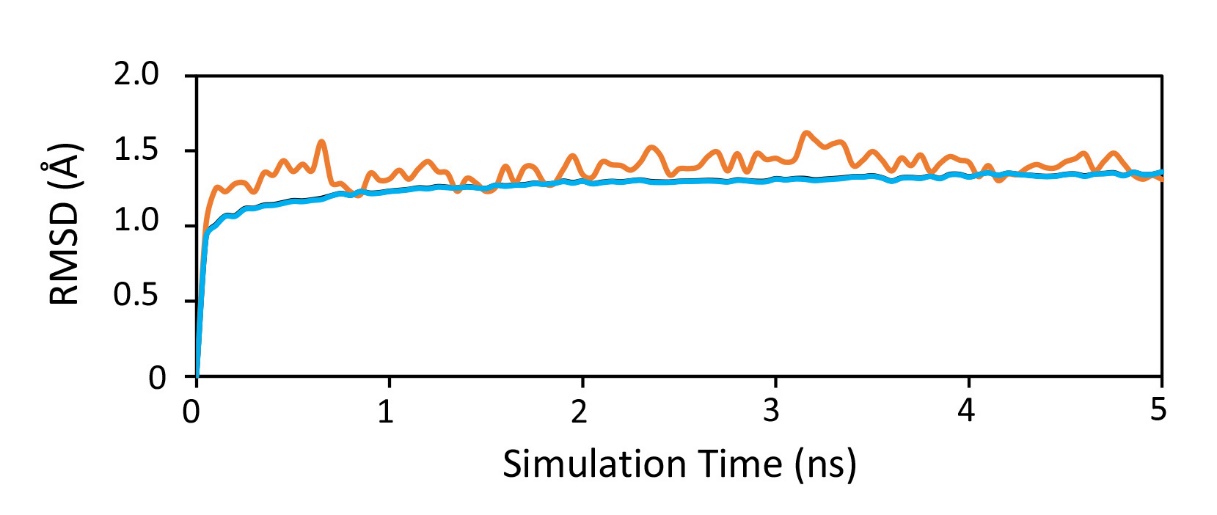
**

**Supplementary** **Figure 4.** RMSD of 23S rRNA (cyan) and L22 (orange) along 5 ns MD simulation.

**
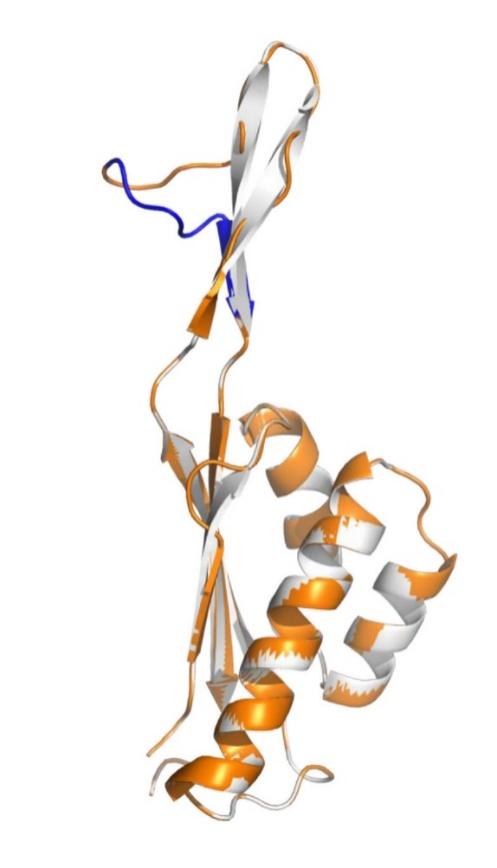
**

**Supplementary** **Figure 5.** Structural difference in L22 (white) and L22 97KRTSAIN98 insertion mutant (orange). The segment of 97KRTSAIN98 insertion is shown in blue.

**
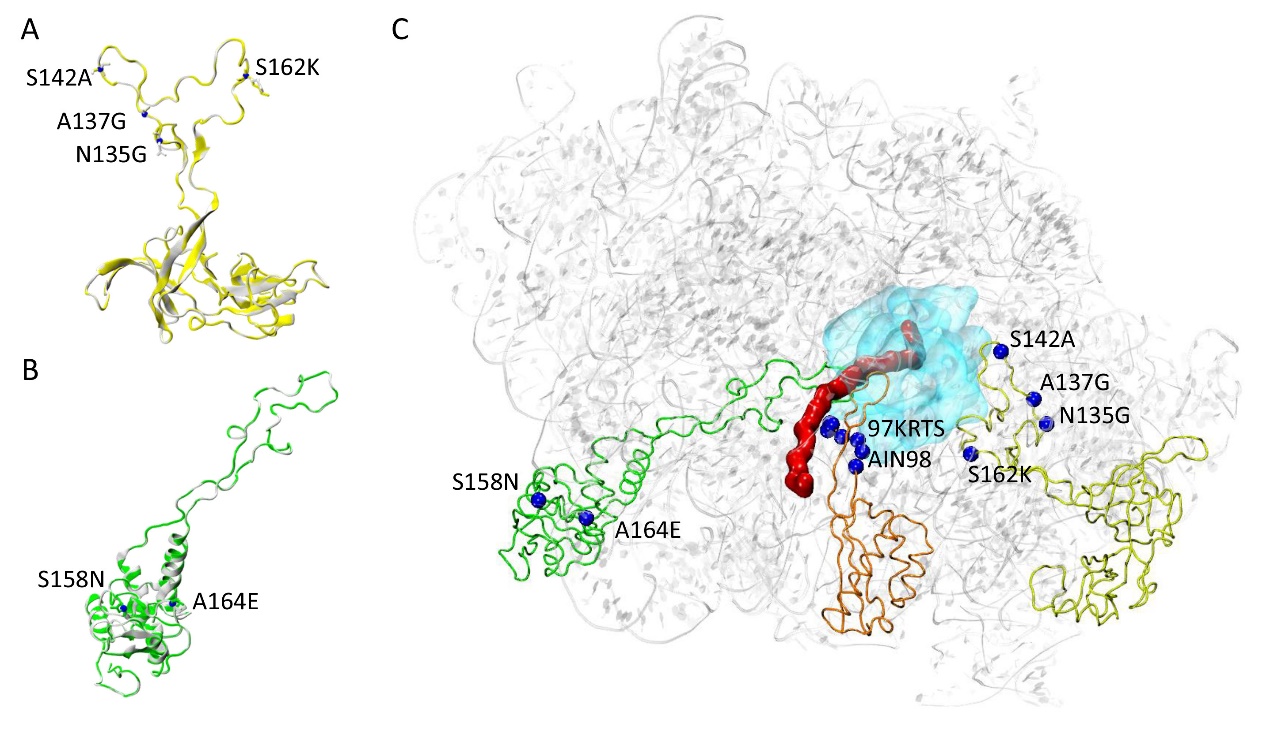
**

**Supplementary** **Figure 6.** The role of mutations in L3 and L4. (A) Structural difference in L3 (white) and L3 mutant (N135G, A137G, S142A and R162K) (yellow). (B) Structural difference in L4 (white) and L4 mutant (S158N and A164E) (green). (C) The structure of ribosome is composed with the 23S rRNA and the homology models of L3 mutant, L4 mutant and L22 mutant. The 23S rRNA is shown in gray, the antibiotic binding site is shown in cyan, the mutant amino acids are marked in blue. The theoretical nascent polypeptide chain is shown in red.

**Supplementary Table 1 Plasmids used in this study**

| **Name** | **function** |
| --- | --- |
| gfp- T | Used to clone *gfp* gene |
| rplC- T | Used to clone *rplC* mutant fragment |
| rplD -T | Used to clone *rplD* mutant fragment |
| rplV -T | Used to clone *rplV* mutant fragment |
| 23s rRNA-3-T | Used to clone 23s rRNA-3mutant fragment |
| 23s rRNA-4-T | Used to clone 23s rRNA-4mutant fragment |
| 23s rRNA-5-T | Used to clone 23s rRNA-5mutant fragment |
| pClone007-rplC | Used to construct the shuttle plasmid PBT2-rplC |
| pClone007-rplD | Used to construct the shuttle plasmid PBT2-rplD |
| pClone007-rplV | Used to construct the shuttle plasmid PBT2-rplV |

**Supplementary** **Table 2** **Strains used in our study**

| **System** | **Strains** |
| --- | --- |
| 1 | *S. xylosus* |
| 2 | Tylosin-resistant *S. xylosus* |
| 3 | L3 (*rplC*) mutant *s.xylosus* (N135G、A137G、S142A and R162K) |
| 4 | L4 (*rplD*) mutant *s.xylosus* (S158N and A164E) |
| 5 | L22 (*rplV*) mutant *s.xylosus* (97KRTSAIN98 insertion) |

**Supplementary Table 3 Primers of ribosomal genes**

| **Oligonucleotide name** | **Sequence (5’ to 3’) a** |
| --- | --- |
| *rplC* F | ATGACCAAAGGAATCTTAGGAAGAAAAA |
| *rplC* R | TTATTTATTACCTTTGATTGATGTTGTG |
| *rplD* F | ATGGCTAATTATGATGTATTAAAAGTAG |
| *rplD* R | TTATCCGAGCACCTCCTCAACTTTTTTA |
| *rplV* F | AAAGCGGTTGCTAAAACAATAAGAATCG |
| r*plV*R | GCTTCTTTAGCTTCTTCTTTACCGTCAC |

**Supplementary Table 4 Primers of shuttle plasims**

| **Oligonucleotide name** | **Sequence (5’ to 3’) a** |
| --- | --- |
| rplC-1 F | TGCACTGCAGTGCA ACTAAAAGAGTAGTGCGAATTGCA |
| rplC-1 R | GTATCAACTGAGACTTCTTGACCTACTTCGTATTCATCAA |
| rplC-2 F | GTCTCAGTTGATACATTCGAAACTG |
| rplC-2 R | TTTACTCATTTATTTATTACCTTTGATTGATGTTGTGATT |
| rplC-3 F | AGGTAATAAATAAATGAGTAAAGGAGAAGAACTTTTCACT |
| rplC-3 F | CTTTCGTATTATATTATTTGTATAGTTCATCCATGCCATG |
| rplC-4 F | TATACAAATAATATAATACGAAAGGAGGAATTGCATAATG |
| rplC-4 R | TACGACGACCATTAGTAATTGGCCGCGGATCCGCG |
| rplD-1 F | TGCACTGCACTGCAAAATTAGGAGGTGGACTTTCGATG |
| rplD-1 R | TAATGCTAAACGACGCATTTTCTTAGGCATTTTGTATGAG |
| rplD-2 F | GTCGTTTAGCATTACGTTCAGC |
| rplD-2 R | AAGTTCTTCTCCTTTACTCATTTATGCGAGCACCTCCCTC |
| rplD-3 F | GGTGCTCGCATAAATGAGTAAAGGAGAAGAACTTTTCACT |
| rplD-3 R | TCTCTTGCTTCCATTATTTGTATAGTTCATCCATGCCATG |
| rplD-4 F | ATGAACTATACAAATAATGGAAGCAAGAGACGTTCTTAAG |
| rplD-4 R | GCGTAGGTTTACCCCAAGGTCGCGGATCCGCG |
| rplV-1 F | TGCACTGCAGTGCATTTATGCTGATGGTGAAAAACGC |
| rplV-1 R | TTTGCTAAAGCGGACATTAATAATTTTTCAACTACTGGTG |
| rplV-2 F | GCTTTAGCAAATGCTGAACATAACTA |

Note: Primers including the indicated restriction site (underlined)

**Supplementary Table 5 Primers used for real-time PCR of drug resistant proteins**

| **Oligonucleotide name** | **Sequence (5’ to 3’) a** |
| --- | --- |
| *rplW* F | TGGAAGCAAGAGACGTTCTTAAGCG |
| *rplW* R | TAGCACGAGTATCAACGTCGAATGTG |
| *infB* F | AGCAGGTGGTATTACACAGCATATCG |
| *infB* R | GCGTGGCCTGGCGTATCAAG |
| *ldh* F | GAACCACGCTGCACCTTATGG |
| *ldh* R | GCGCCAGCAGTAATTACAACTATGTC |
| *aldA-1* F | GTGACCGCAGGCATCGTTCC |
| *aldA-1* R | CTGCTGGTATTGTTGACTCACGAATG |
| *katA* F | GAGAGGTGATTCCAGAACGACGTATG |
| *katA* R | ATCCACGAATATCACGCTCTGCATC |
| *trxA* F | CAACTTGGTGTGGCCCTTGT |
| *trxA* R | ACAACTTTATCTACTGGTTCGCCA |
| *gros* F | AGAGCAAACAACAAAGAGCGG |
| *gros* R | GCCCTGCACCTACTGCAATTA |
| *cl* F | GGCAGCGTTAATCGTGGTGA |
| *cl* R | CTAGCACACTGACTGCGACG |
| 16S rRNAF | CGGGCAATTTGTTTAGCA |
| 16S rRNAR | ATTAGGTGGAGCAGGTCA |
